# Supplementary material for: Modularer Lehrerausbildungskurs des Deutschen Rates für Wiederbelebung (GRC) für den Wiederbelebungsunterricht in Schulen
Source: Springer Nature journal article supplement (doi:10.1007/s10049-019-0609-x), 2019-05-27
Supplement: MOESM1 [file 16753886]

# Positionspapiers des Europäischen Rats für Wiederbelebung

**KIDS SAVE LIVES – ERC Positionspapier zur Schülerausbildung in Wiederbelebung: „Hände, die helfen – Kinder trainieren ist Training fürs Leben!“**

Der Herzkreislauf-Stillstand außerhalb einer Klinik ist die dritthäufigste Todesursache in zivilisierten Ländern (1). Die Überlebensraten der Betroffenen liegen länderspezifisch zwischen 2-10% (2–4). Alleine in Europa und in den USA sterben mehr als 700.000 Menschen pro Jahr an den Folgen eines solchen Herzkreislauf-Stillstandes. Diese Zahlen sind auch auf andere Industrienationen weltweit übertragbar. Sehr viele Leben könnten gerettet werden, wenn mehr Laien umgehend mit Wiederbelebungsmaßnahmen beginnen würden (2).

Die Zeit bis zum Eintreffen des Notarztes kann zwischen 6 und 12 Minuten betragen und dauert in manchen Fällen auch länger. Nach einem Herzkreislauf-Stillstand zählt jede Minute, denn ohne Sauerstoffzufuhr beginnt das Gehirn bereits nach 3-5 Minuten unwiederbringlich zu sterben (5). Über 70% der Herzkreislauf-Stillstände sind beobachtet, weil sie im familiären Umfeld, im Freundeskreis oder in der Öffentlichkeit stattfinden (2,5). Die Zeit bis zum Eintreffen des Notarztes kann also sehr erfolgreich durch Laien überbrückt werden. In den ersten Minuten nach dem Herzkreislauf-Stillstand ist bei erwachsenen Patienten noch so viel Sauerstoff im Blut und in der Lunge, dass der Beginn mit sofortiger Herzdruckmassage allein in Europa mehr als 100.000 Leben jedes Jahr retten kann (6; in Deutschland sind es etwa 10.000 Menschenleben zusätzlich pro Jahr).

Die effektive Durchführung von Wiederbelebungsmaßnahmen ist einfach – es ist sehr unwahrscheinlich bei der Laienreanimation etwas falsch zu machen. Durch die Laienreanimation kann die Überlebenschance der Patienten verdoppelt bis vervierfacht werden (2). Dennoch finden sich lediglich in einigen wenigen Ländern Laienwiederbelebungsquoten von 60–80%; in den meisten Ländern ist die Quote weit unter 20% (7).

Die verbindliche, flächendeckende Ausbildung von Schülerinnen und Schülern in Laienreanimation ist der wichtigste Baustein, wenn es um die landesweite Steigerung der Laienwiederbelebungsquote geht (8-13). Es ist davon auszugehen, dass dies der erfolgreichste Weg ist, um die gesamte Bevölkerung zu erreichen. Die höchsten Laienwiederbelebungsquoten finden sich in den skandinavischen Ländern, in denen die Schülerausbildung in Wiederbelebung bereits seit Jahrzehnten verpflichtend und Teil des Schulunterrichts ist (12). Dieses Konzept breitet sich auch in anderen Ländern zunehmend aus.

Unterstützt wird ein entsprechendes weltweites Vorgehen von der Weltgesundheitsorganisation (WHO), die Schülerausbildung durch das „Endorsement“ des „KIDS SAVE LIVES“-Statement seit dem Jahr 2015 weltweit empfiehlt. Es handelt sich dabei um ein gemeinsames Statement des European Resuscitation Council (ERC), der European Patient Safety Foundation (EPSF), des International Liaison Committee on Resuscitation (ILCOR) und der World Federation of Societies of Anesthesiologists (WFSA) (6, 10, 11).

Das weltweite Konzept empfiehlt zwei Stunden Wiederbelebungstraining pro Schuljahr ab dem 12. Lebensjahr. In diesem Alter sind die Schulkinder für das Thema sehr zugänglich und lernen ganz einfach und mit großer Begeisterung anderen zu helfen (9). Wenn die Ausbildung der Schülerinnen und Schüler in jungen Jahren beginnt, dann ist das wie mit dem Schwimmen oder dem Fahrradfahren: Sie verlernen die Wiederbelebung nicht mehr (14).

Medizinisches Fachpersonal, ausgebildete Lehrkräfte und viele andere sind wichtige Multiplikatoren und können erfolgreich Schülerinnen und Schüler in Wiederbelebung trainieren (15). Auch können die Schülerinnen und Schüler die erworbenen Kenntnisse und Fähigkeiten an ihre Familien und ihre Freunde weitergeben.

Fig. 1. Das “KIDS SAVE LIVES” Logo ist eine Entwicklung des Italian Resuscitation Council (IRC). Wir begrüßen es sehr, dass der IRC das Logo allen Akteuren der “KIDS SAVE LIVES”-Kampagne zur kostenfreien Nutzung überlässt

Durch die weltweite “KIDS SAVE LIVES”-Initiative können wir die Überlebensrate der Menschen mit Herzkreislauf-Stillstand verdoppeln bis vervierfachen. Auf diese Weise können wir jedes Jahr 300.000 Menschen zusätzlich retten - das sind fast 1.000 Leben am Tag und ein Leben in jeder Minute.

**Die 10 ERC-Thesen zu „KIDS SAVE LIVES“:**

**(Modifikation für Deutschland)**

1. Jeder kann Leben retten, und selbst Kinder können es (9–16).
2. Bis zu zwei Schulstunden jährlich sind ausreichend, um Schülerinnen und Schüler Wiederbelebungstechniken zu vermitteln und sie in Wiederbelebung erfolgreich auszubilden (9–11,15,16).
3. Die Schülerausbildung soll vor allem aus praktischen Trainingseinheiten bestehen und um weitere theoretische Inhalte, z.B. auch mittels virtuellen Lernens, ergänzt werden (9). Der Einsatz eines professionellen Wiederbelebungsequipments sowie die Verwendung von Wiederbelebungspuppen sind sinnvoll (4).
4. Schülerinnen und Schüler sollen ab dem 7. Schuljahr ausgebildet werden, man kann auch bereits in früheren Jahren beginnen (9-11,15).
5. Die Schülerinnen und Schüler sind ein wichtiger Multiplikator und sollen ermutigt werden, ihr Wissen und Können auch an andere Menschen weiterzugeben. Die Hausaufgabe nach dem Wiederbelebungstraining lautet: „Trainiere innerhalb der nächsten zwei Wochen bis zu zehn weitere Personen und bringe die Liste mit den Namen mit (unter Beachtung des Datenschutzes)“.
6. Hierfür qualifizierte Anästhesisten, Kardiologen, Ausbilder der Hilfsorganisationen, Notfallsanitäter, Rettungsassistenten, Pflegekräfte, Medizinstudierende, Studierende anderer Fachrichtungen, ausgebildete Lehrer und viele andere Freiwillige können die Schülerausbildung erfolgreich durchführen - an Schulen, in Krankenhäusern und an anderen Orten (6,9,15,16).
7. Die verantwortlichen Akteure in den Ministerien, die Schulminister der Länder und andere führende Politiker sind aufgerufen, im ganzen Land ein entsprechendes Konzept zur Ausbildung von Schülern in Wiederbelebungstechniken zu implementieren.
8. Darüber hinaus ist jeder nationale Resuscitation Council oder eine vergleichbare Organisation angehalten, im eigenen Land eine nationale Initiative bzw. „KIDS SAVE LIVES“-Kampagne zu unterstützen.
9. Das Wiederbelebungstraining steigert die soziale Verantwortung und die Sozialkompetenz der Kinder (9–11).
10. Die Schülerausbildung in Wiederbelebung rettet Leben, steigert die gesellschaftliche Produktivität und reduziert die nationalen Gesundheitsausgaben (12,17).

**Literatur** (zu den 10 ERC-Thesen „KIDS SAVE LIVES“):

1. Taniguchi D, Baernstein A, Nichol G. Cardiac arrest: a public health perspective. Emerg Med Clin North Am 2012;30:1–12.

2. Böttiger BW, Grabner C, Bauer H, et al. Long term outcome after out-of-hospital cardiac arrest with physician staffed emergency medical services: the Utstein style applied to a midsized urban/suburban area. Heart 1999;82:674–9.

3. Monsieurs KG, Nolan JP, Bossaert LL, et al., ERC Guidelines 2015 Writing Group. European Resuscitation Council Guidelines for Resuscitation 2015: Section 1.Executive summary. Resuscitation 2015;95:1–80.

4. Nolan JP, Hazinski MF, Aickin R, et al. Part 1: Executive summary: 2015International Consensus on Cardiopulmonary Resuscitation and Emergency Cardiovascular Care Science with Treatment Recommendations. Resuscitation2015;95:e1–31.

5. Breckwoldt J, Schloesser S, Arntz HR. Perceptions of collapse and assessment of cardiac arrest by bystanders of out-of-hospital cardiac arrest (OOHCA). Resuscitation 2009;80:1108–13.

6. Böttiger BW. “A Time to Act” – Anaesthesiologists in resuscitation help save200,000 lives per year worldwide: school children, lay resuscitation, telephone-CPR, IOM and more. Eur J Anaesthesiol 2015;32:825–7.

7. Gräsner JT, Bossaert L. Epidemiology and management of cardiac arrest: what registries are revealing. Best Pract Res Clin Anaesthesiol 2013;27:293–306.

8. Perkins GD, Handley AJ, Koster RW, et al., Adult basic life support and automated external defibrillation section Collaborators. European Resuscitation Council Guidelines for Resuscitation 2015: Section 2. Adult basic life support and automated external defibrillation. Resuscitation 2015;95:81–99.

9. Bohn A, Lukas RP, Breckwoldt J, Böttiger BW, Van Aken H. ’Kids save lives’: why schoolchildren should train in cardiopulmonary resuscitation. Curr Opin Crit Care 2015;21:220–5.

10. Böttiger BW, Van Aken H. Training children in cardiopulmonary resuscitation worldwide. Lancet 2015;385:2353.

11. Böttiger BW, Van Aken H. Kids save lives – Training school children in cardiopulmonary resuscitation worldwide is now endorsed by the World Health Organization (WHO). Resuscitation 2015;94:A5–7.

12. Wissenberg M, Lippert FK, Folke F, et al. Association of national initiatives to improve cardiac arrest management with rates of bystander intervention and patient survival after out-of-hospital cardiac arrest. JAMA 2013;310:1377–84.

13. Greif R, Lockey AS, Conaghan P, Lippert A, De Vries W, Monsieurs KG, Education and implementation of resuscitation section Collaborators. European Resus-citation Council Guidelines for Resuscitation 2015: Section 10. Education and implementation of resuscitation. Resuscitation 2015;95:288–301.

14. De Buck E, Van Remoortel H, Dieltjens T, et al. Evidence-based educational path-way for the integration of first aid training in school curricula. Resuscitation2015;94:8–22.

15. Lukas RP, Van Aken H, Mölhoff T, et al. Kids save lives: a six-year longitudinal study of schoolchildren learning cardiopulmonary resuscitation: Who should do the teaching and will the effects last? Resuscitation 2016;101:35–40.

16. Plant N, Taylor K. How best to teach CPR to schoolchildren: a systematic review.Resuscitation 2013;84:415–21.

17. Kragholm K, Wissenberg M, Mortensen RN, et al. Return to work in out-of-hospital cardiac arrest survivors: a nationwide register-based follow-up study. Circulation 2015;131:1682–90.
